# Supplementary material for: Time Series Analysis of SARS-CoV-2 Genomes and Correlations among Highly Prevalent Mutations
Source: PubMed Central journal article supplement (PMC9603882; doi:10.1128/spectrum.01219-22), 2022-09-07
Supplement: spectrum.01219-22-s0001.pdf [file spectrum.01219-22-s0001.pdf]

**Time series analysis of COVID-19 data identifies correlations among highly prevalent mutations**

**Neha Periwal<sup>1</sup>, Shravan Rathod<sup>2</sup>, Sankritya Sarma<sup>3</sup>, Gundeep Singh<sup>4</sup>, Avantika Jain<sup>1,5</sup>, Ravi P. Barnwal<sup>6</sup>, Kinsukh R Srivastava<sup>7</sup>, Baljeet Kaur<sup>8</sup>, Pooja Arora<sup>3</sup> and Vikas Sood<sup>1</sup>**

**Affiliations:**

- 1. Biochemistry Department, SCLS, Jamia Hamdard**
- 2. Chemistry Department, Smt. S.M. Panchal Science College, Talod, India**
- 3. Zoology Department, Hansraj College, University of Delhi**
- 4. Humber College, Toronto, Canada**
- 5. DIPSAR, Delhi**
- 6. Biophysics Department, Punjab University**
- 7. Division of Medicinal and Process Chemistry, CDRI, Lucknow**
- 8. Department of Computer Science, Hansraj College, University of Delhi**

Supplementary Table 1: Table showing the number of genomes that were analysed in this study. The number of genomes collected in month wise manner is also shown in the table.

| Month          | Number of Genomes |
|----------------|-------------------|
| January 2020   | 141               |
| February 2020  | 289               |
| March 2020     | 8453              |
| April 2020     | 5023              |
| May 2020       | 3250              |
| June 2020      | 3379              |
| July 2020      | 7359              |
| August 2020    | 4833              |
| September 2020 | 2225              |
| October 2020   | 1528              |
| November 2020  | 1997              |
| December 2020  | 3782              |
| January 2021   | 9633              |
| February 2021  | 859               |
| March 2021     | 6970              |
| Total          | 59541             |
